# Aerobic training in the ‘oldest old’: the effect of 24 weeks of training

KATIE E. MALBUT, SUSIE DINAN<sup>1</sup>, ARCHIE YOUNG<sup>2</sup>

University Department of Geriatric Medicine, Royal Free and University College Medical School, Royal Free Campus, London, UK

<sup>1</sup>Present address: Primary Care & Population Sciences, Royal Free and University College Medical School, London, UK

<sup>2</sup>Present address: Geriatric Medicine, Department of Clinical and Surgical Sciences, University of Edinburgh, Edinburgh, UK

Address correspondence to: K. Malbut, Department of Epidemiology and Public Health, University College London, 1–19 Torrington Place, London WC1E 6BT, UK. Email: kathrynm@public-health.ucl.ac.uk

---

## Abstract

**Objective:** to determine the effects of aerobic training on the maximal aerobic power of healthy, very elderly people.

**Design:** a 12-week control period followed by 24 weeks of progressive, weight bearing, aerobic training.

**Subjects:** 26 men and women aged 79 to 91 years conforming to pre-determined health criteria.

**Methods:** we took measurements before and after a 12 week control period and following 24 weeks of training. These were maximal aerobic power ( $\text{VO}_2\text{max}$ ), heart rate at an oxygen consumption of  $10 \text{ ml.kg}^{-1}.\text{min}^{-1}$  (HR at  $\text{VO}_210$ ), resting heart rate, isometric knee extensor strength, isometric elbow flexor strength and lower limb extensor power.

**Main results:** pre-control values of  $\text{VO}_2\text{max}$  for the women and men were 14.1 (SD 2.79) and 22.0 (5.12)  $\text{ml.kg}^{-1}.\text{min}^{-1}$  respectively. There was no significant change in the  $\text{VO}_2\text{max}$  of either group over the control period. After training, there was a 15% increase in the  $\text{VO}_2\text{max}$  of the women ( $P < 0.01$ ) but no change was observed in the men. In the women, there was no significant change in HR at  $\text{VO}_210$  over the control period but a 14% decrease ( $P < 0.01$ ) after training. In the men there was a 7% ( $P < 0.05$ ) increase in HR at  $\text{VO}_210$  over the control period and a 5% ( $P < 0.05$ ) decrease after training. No effect of training was seen on isometric knee extensor strength, isometric elbow flexor strength or lower limb extensor power of either group.

**Conclusion:** progressive aerobic training can increase the maximal aerobic power of very elderly women. A 15% increase in  $\text{VO}_2\text{max}$  may prevent many elderly women from crossing functionally important thresholds, thereby helping to maintain independence.

**Keywords:** maximal aerobic power, aged, 80 and over, perceived exertion, endurance training

---

## Introduction

Maximal aerobic power ( $\text{VO}_2\text{max}$ ) declines with advancing age [1, 2]. Many elderly people, in particular women, have such low values of  $\text{VO}_2\text{max}$  that it would need only a further small reduction to render some everyday activities either unpleasant or impossible to perform.

Aerobic training increases  $\text{VO}_2\text{max}$  in younger adults and in younger old subjects (mean ages 70–74 years) [3–6]. No controlled study has looked at the effects of training in subjects over 80 years of age, who are arguably those who would benefit most from an improvement in  $\text{VO}_2\text{max}$ . The purpose of the present study was to examine the effects of 24 weeks of aerobic training on  $\text{VO}_2\text{max}$ , and sub-maximal indicators of aerobic capacity in very elderly men and women.

## Methods

### Subjects and study design

The study received ethical approval and all subjects gave written informed consent. We recruited potential subjects, in their 80th year or older, from a volunteer database, through an article in a local newspaper and by word of mouth. We identified 34 subjects considered ‘healthy’ or ‘medically stable’ [7] from a health questionnaire, resting blood pressure and resting electrocardiogram (ECG). These subjects had a medically supervised exercise ECG and five were excluded. A further 3 subjects dropped out before the training began. Of the 26 subjects who commenced training, 5 failed to complete training; 2 dropped out due to illness unrelated to the study, 1 was diagnosed with

Alzheimer's disease during the study, 1 found the time commitment too great and 1 experienced aggravation of a previous knee problem. Characteristics of those completing the study are in Table 1.

All subjects were familiarised with the procedures on two visits to the laboratory. Each subject then performed a progressive maximal effort test on each of three separate occasions, separated by at least 3 days. The best of these tests was taken as the pre-control value. A single maximal effort test was performed after the 12-week control period and after 24 weeks of training. We measured height, weight, resting heart rate, isometric knee extensor strength (IKES) [8], isometric elbow flexor strength (IEFS) [8] and explosive leg power (LEP) [8] before and after the 12-week control period and after training.

Throughout the study subjects were asked to maintain their usual activities. To allow for time of year effects [5] half the group trained over the summer and half over the winter.

### Aerobic power

Preliminary work had confirmed the feasibility, and reproducibility of maximal tests in very old age [9]. Subjects were asked to avoid caffeine for at least 2 hours before testing. For each individual subject, tests were performed at the same time of day on each occasion and at the same laboratory temperature. The same two investigators, both trained in cardiopulmonary resuscitation, supervised each test. Resting heart rate was taken after each subject had rested on a couch for 10 minutes.

Subjects pedalled an electrically braked cycle ergometer (Cybex) starting at a work rate of 25 W and progressing in 15 W or 25 W increments every 2.5 minutes until they could no longer continue, despite encouragement. Tests for each subject had been tailored from preliminary tests to try to get each subject to their limit in 10–12.5 minutes.

Expired gas was collected via a nasal and mouth breathing facemask (Hans Rudolph type 7930 or 7940) and passed into a mixing chamber from which samples were drawn through gas analysers. Heart rate

(Hewlett Packard, UK), CO<sub>2</sub> concentration (infra red; PK Morgan, UK), O<sub>2</sub> concentration (paramagnetic; PK Morgan) and inspired volume (Harvard dry gas meter) were measured during the last minute of a 2.5 minute rest period, every 30 seconds during exercise and at peak exercise. ECG was monitored continuously (Datascope, Cambridge, UK). The CO<sub>2</sub> and O<sub>2</sub> analysers were calibrated using room air and two different gas mixtures. The dry gas meter was calibrated with a 1 litre syringe (PK Morgan).

We measure lactate concentration in fingertip samples (intact whole blood) taken (where possible) at the highest work rate and 5–7 minutes post exercise (LM5 Analox Instruments, London, UK). The analyser was calibrated with a lactate/pyruvate quality control serum and a lactate standard (both Analox Instruments).

The highest value for VO<sub>2</sub> during a test was accepted as VO<sub>2</sub>max only if the respiratory exchange ratio (RER) was >1.0 [9, 10] and the subject was judged subjectively to have made a 'maximal effort' test.

The heart rate at an oxygen consumption of 10 ml.kg<sup>-1</sup>.min<sup>-1</sup> (HR at VO<sub>2</sub>10) was calculated with an equation derived by linear regression (for each individual subject).

### Exercise training

We asked each subject to attend three of six exercise sessions per week over a 24-week period. The exercise sessions consisted of a consistently formatted progressive exercise to music programme. Each session comprised warm up (13–15 minutes), weight-bearing aerobic training (13 increasing to 20 minutes), warm down (10 minutes), and strength training, flexibility and relaxation components (10–15 minutes). The aerobic component was built up gradually over the first 6 weeks, lasting 13 minutes at week two, 17 minutes at week four and 20 minutes by week six. After week six, the intensity of the aerobic exercise was increased progressively.

Training intensity was a rating of perceived exertion (RPE) [11–14] between 13 and 15. All subjects were thoroughly familiarised with the RPE scale during their pre-control tests and at regular intervals throughout the training programme. During the aerobic component of each session subjects were shown the RPE scale and asked to rate how hard they were working. If necessary the intensity of the exercise was adjusted, by giving alternatives, for individual subjects.

We monitored heart rate (Polar Sportstester) in each subject in at least one session per week, in order to compare RPE levels with the percentage of their maximal heart rate (%HRmax) and therefore %VO<sub>2</sub>max (see below), in those subjects who had performed a maximal pre-training test.

Resistance for strength training was provided initially by body weight and the use of different grades of theraband (Nottingham Rehab, Nottingham, UK). Later,

**Table 1.** Pre-control characteristics of the subjects who completed training

|              | Age (years) | Height (m) | Weight (kg) |
|--------------|-------------|------------|-------------|
| Men (n=9)    |             |            |             |
| Range        | 80–87       | 1.6–1.8    | 58.5–85.5   |
| Median       | 80          | 1.69       | 68          |
| Mean         | 81          | 1.69       | 68          |
| (SD)         | (2.28)      | (0.06)     | (8.3)       |
| Women (n=12) |             |            |             |
| Range        | 79–91       | 1.5–1.65   | 44–65.5     |
| Median       | 80          | 1.56       | 55.9        |
| Mean         | 83          | 1.58       | 56.5        |
| (SD)         | (4.58)      | (0.05)     | (6.0)       |

these were supplemented by the use of body bars (Forza Fitness International, London, UK).

**Statistical analysis**

We examined data in the way described by Sokal and Rohlf [15]. If analysis of variance (ANOVA) identified the presence of a significant treatment effect we tested the percentage changes over the control period for statistical significance (Wilcoxon signed rank test [16]). If there was no significant change over the control period, the changes (%) over the training period were calculated from the individual means of pre- and post-control. If the change over the control period was significant, however, we used post-control data as the starting point for calculating the changes (%) over the training period. We then tested training changes for statistical significance (Wilcoxon signed rank test).

**Results**

**Attendance**

There was no significant difference between the number of sessions attended by the men (median 71% range 44–100) and the number attended by the women (median 65% range 46–88) (unpaired *t*-test) [16].

**Exercise intensity**

The mean RPE for the older women was within the desired training zone by week 2 but the men did not achieve this until week 4. Although after week 4 the mean RPE of both the men and women was within the desired training zone, overall the women were found to have worked at a slightly higher RPE than the men (mean RPE, averaged over the training period, 14.4 and 13.6 respectively, *P* < 0.01).

Satisfactory pre- and post-training calibration of RPE against VO<sub>2</sub>max and HRmax was achieved for 7 men and 5 women. In their pre-training tests an RPE of 14 corresponded to 83% of VO<sub>2</sub>max, 86% HRmax in the men, and 82% VO<sub>2</sub>max, 85% HRmax in the women. These figures were virtually unchanged after training, viz 81%, 84% in the men, and 79%, 85% in the women.

In the weekly checks of RPE against HR during the aerobic component of the training, an RPE of 14 corresponded to 79% HRmax in the men, and 81% HRmax in the women. This suggests that a training RPE of 14 might have corresponded to a slightly lower %VO<sub>2</sub> max (perhaps about 76%, in both men and women) than during the pre- and post-training tests. This, in turn, would suggest that the overall mean training RPE values (13.6 for the men and 14.4 for the women) would be consistent with the men training at an average of about 74% VO<sub>2</sub>max and the women at 80% VO<sub>2</sub>max.

**Weight**

ANOVA showed the presence of a ‘treatment’ effect in the women and Wilcoxon signed rank test showed no significant difference over the control period. Taking the mean of the pre- and post-control values as the baseline, however, the small decrease in weight over the training period (Table 2) did not reach statistical significance. There was no evidence of a ‘treatment’ effect in the men.

**Maximal oxygen uptake**

Collection of expired gas for analysis was not possible in one subject after either 12 or 24 weeks of training because of increasing intolerance of the facemask.

We obtained VO<sub>2</sub>max data from nine women and eight men (Table 2). ANOVA confirmed a treatment effect in the VO<sub>2</sub>max of the women (*P* < 0.05) but not the men. In the women there was no significant change in VO<sub>2</sub>max over the control period, but there was a 15% mean increase, when expressed as ml.kg<sup>-1</sup>.min<sup>-1</sup>, (*P* < 0.01), and a 13% mean increase when expressed as l min<sup>-1</sup> (*P* < 0.02) in VO<sub>2</sub>max following training (Figure 1).

ANOVA failed to demonstrate a treatment effect in either the men or women in terms of HRmax, RERmax or lactate max (LAmax) (Table 3).

**Table 2.** Weight, VO<sub>2</sub>max, HRmax, RERmax and Lactate max (LAmax) values for the 8 men and 9 women who performed maximal tests. (See Methods for defining criteria for ‘maximal’.) Expressed as mean (standard deviation)

|                                                               | Pre-control | Post-control | Post-training            |
|---------------------------------------------------------------|-------------|--------------|--------------------------|
| Weight (kg)                                                   |             |              |                          |
| Men                                                           | 67.6 (8.7)  | 69.6 (8.8)   | 67.9 (9.3)               |
| Women                                                         | 57.4 (5.6)  | 57.7 (6.1)   | 56.4 (6.4)               |
| VO <sub>2</sub> max (ml.kg <sup>-1</sup> .min <sup>-1</sup> ) |             |              |                          |
| Men                                                           | 22.2 (5.8)  | 21.8 (5.4)   | 22.2 (6.2)               |
| Women                                                         | 14.5 (2.5)  | 13.8 (3.7)   | 16.2 (3.1) <sup>a</sup>  |
| VO <sub>2</sub> max (l min <sup>-1</sup> )                    |             |              |                          |
| Men                                                           | 1.51 (0.29) | 1.49 (0.30)  | 1.47 (0.28)              |
| Women                                                         | 0.83 (0.14) | 0.79 (0.20)  | 0.91 (0.17) <sup>a</sup> |
| HRmax (bpm)                                                   |             |              |                          |
| Men                                                           | 143 (20)    | 138 (17)     | 137 (20)                 |
| Women                                                         | 130 (16)    | 126 (14)     | 129 (17)                 |
| RERmax                                                        |             |              |                          |
| Men                                                           | 1.08 (0.05) | 1.1 (0.10)   | 1.07 (0.07)              |
| Women                                                         | 1.06 (0.05) | 1.02 (0.08)  | 1.03 (0.11)              |
| LAmax (mmol l <sup>-1</sup> )                                 |             |              |                          |
| Men <sup>b</sup>                                              | 4.3 (0.7)   | 4.6 (1.4)    | 4.9 (1.5)                |
| Women <sup>c</sup>                                            | 3.5 (1.0)   | 3.3 (0.7)    | 3.3 (1.4)                |

<sup>a</sup>Significantly different from mean of pre- and post-control.

<sup>b</sup>*n* = 7.

<sup>c</sup>*n* = 6.

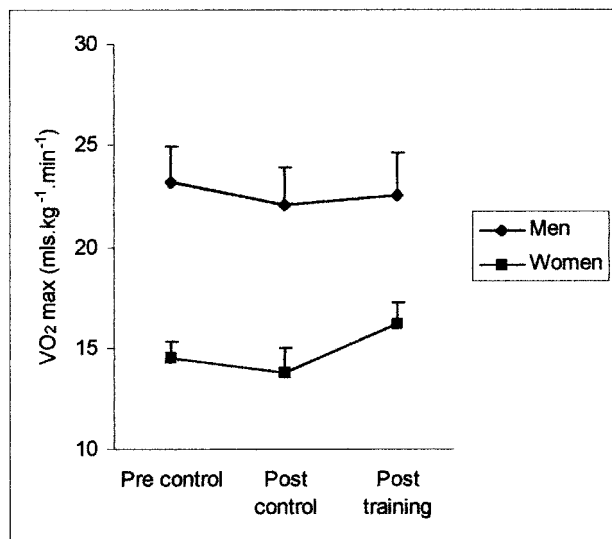

Figure 1. Maximal oxygen uptake (8 men and 9 women) (Mean + 1 SEM).

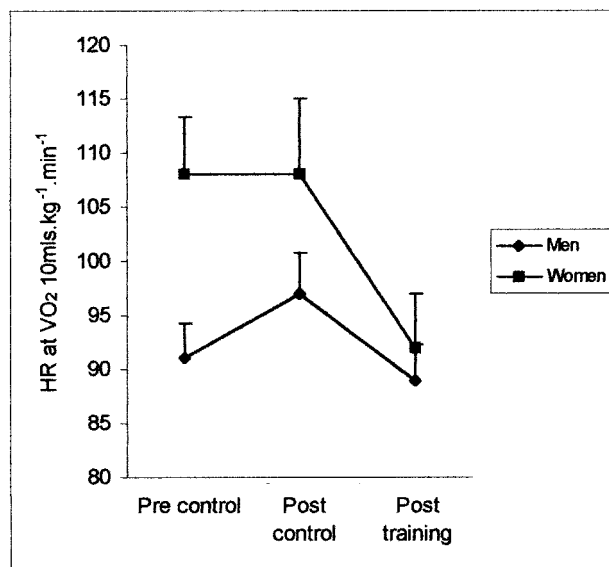

Figure 2. Heart rate at VO<sub>2</sub> of 10 ml.kg<sup>-1</sup>.min<sup>-1</sup> (9 men and 9 women) (Mean + 1 SEM).

Table 3. Heart rate at VO<sub>2</sub> of 10 ml.kg<sup>-1</sup>.min<sup>-1</sup>, resting heart rate, isometric knee extensor strength (IKES), isometric elbow flexor strength (IEFS) and lower limb explosive power (LEP) at each time point. Expressed as mean (standard deviation)

|                                                                 | Pre-control | Post-control         | Post-training        |
|-----------------------------------------------------------------|-------------|----------------------|----------------------|
| HR at VO <sub>2</sub> 10 ml.kg <sup>-1</sup> .min <sup>-1</sup> |             |                      |                      |
| Men (n=9)                                                       | 91 (10)     | 97 (11) <sup>a</sup> | 89 (10) <sup>b</sup> |
| Women (n=9)                                                     | 107 (12)    | 108 (21)             | 92 (15) <sup>c</sup> |
| Resting heart rate (bpm)                                        |             |                      |                      |
| Men (n=9)                                                       | 74 (10)     | 75 (12)              | 71 (13)              |
| Women (n=11)                                                    | 75 (8)      | 73 (7)               | 61 (20) <sup>c</sup> |
| IKES (N)                                                        |             |                      |                      |
| Stronger leg at pre-control                                     |             |                      |                      |
| Men (n=9)                                                       | 356 (115)   | 359 (135)            | 340 (74)             |
| Women (n=11)                                                    | 239 (54)    | 250 (74)             | 264 (60)             |
| IEFS (N)                                                        |             |                      |                      |
| Stronger arm at pre-control                                     |             |                      |                      |
| Men (n=9)                                                       | 194 (35)    | 179 (51)             | 209 (62)             |
| Women (n=10)                                                    | 138 (29)    | 134 (29)             | 136 (21)             |
| LEP (W)                                                         |             |                      |                      |
| More powerful leg at pre-control                                |             |                      |                      |
| Men (n=9)                                                       | 139 (46)    | 138 (46)             | 144 (48)             |
| Women (n=11)                                                    | 75 (24)     | 71 (33)              | 79 (25)              |

<sup>a</sup>Significantly different from pre-control.

<sup>b</sup>Significantly different from post-control.

<sup>c</sup>Significantly different from mean of pre- and post-control.

### Heart rate at an oxygen consumption of 10 ml.kg<sup>-1</sup>.min<sup>-1</sup> and resting heart rate

In two of the women it was not possible to calculate the HR at VO<sub>2</sub>10 as tests were too short to perform linear regression.

ANOVA confirmed a treatment effect in the men ( $P < 0.01$ ) and in the women ( $P < 0.005$ ) (Table 3). In the women there was no significant change in the HR at VO<sub>2</sub>10 over the control period, but there was a 14% mean decrease ( $P < 0.01$ ) following training. In the men there was a 7% mean increase ( $P < 0.05$ ) in the HR at VO<sub>2</sub>10 over the control period and a 9% mean decrease ( $P < 0.05$ ) following training (Figure 2).

ANOVA confirmed a treatment effect in the resting HR of the women ( $P < 0.001$ ) but not of the men. In the women, there was no significant change in resting heart rate over the control period but there was a 13% decrease ( $P < 0.01$ ) after training (Table 3).

### Muscular strength and power

We present data for the limbs which were stronger or more powerful at the pre-control time point. ANOVA failed to demonstrate a treatment effect in IKES or LEP of the men or of the women (Table 3). ANOVA also failed to demonstrate a treatment effect in the IEFS of the women but a treatment effect was demonstrated in the men ( $P < 0.05$ ). There was no significant change in IEFS of the men over the control period, but there was a 22.5% increase in IEFS following training which approached significance ( $P = 0.1$ ).

### Discussion

The 15% increase in the VO<sub>2</sub>max of the women, and the decreases in their resting HR and HR at VO<sub>2</sub>10, indicate that the ability to respond to a progressive aerobic training programme is maintained in women even in their 80s.

The women's mean pre-training value of  $\text{VO}_2\text{max}$  of  $14.0 \text{ ml.kg}^{-1}.\text{min}^{-1}$  is similar to that reported by Foster *et al.* [17] in a group of 8 women of mean age 81 years *viz*  $13.6 \text{ ml.kg}^{-1}.\text{min}^{-1}$ . The subjects in the present study were all relatively healthy and were all still living independently; such a low  $\text{VO}_2\text{max}$  would suggest that even in health, most women aged over 80 would experience difficulties in the performance of everyday tasks.

The mean increase in  $\text{VO}_2\text{max}$  of 15% seen in the women of the present study is similar to that reported in studies of younger old women. Warren *et al.* reported an increase in  $\text{VO}_2\text{max}$  of 12.6% in women with a mean age of 74 years in response to 12 weeks of training [6] while Cress *et al.* reported an increase of 16% in women of mean age 72 years in response to 50 weeks of training [5]. Foster *et al.* reported a 15% increase in response to a moderate exercise programme lasting 10 weeks in women of a mean age (78 years) nearer to that of the women in the present study, but their study was not adequately controlled [18].

It is unclear why the men in this study showed no changes in  $\text{VO}_2\text{max}$  or in resting HR. They did show a reduction in HR at  $\text{VO}_210$ , suggesting a response to training, but this is difficult to interpret as it followed an increase in this variable during the control period. It seems unlikely that older women, but not men, are able to respond to training. There was no significant difference between the men and the women in attendance levels and, although the men may have trained at a slightly lower % $\text{VO}_2\text{max}$  than the women, their average aerobic training intensity was still probably greater than 70%  $\text{VO}_2\text{max}$ .

There is nothing published on changes in  $\text{VO}_2\text{max}$  in response to training in men aged 80 or over. In 'younger' old age groups increases in  $\text{VO}_2\text{max}$  have been reported in response to training in men and in mixed groups, *viz* Cunningham *et al.* in men of mean age 63 years [19], Tonino and Driscoll in 5 men and 4 women, mean age 70 years [3], Seals *et al.* in 24 men and women of mean age 63 years [20] and Hagberg *et al.* in men and women of mean age 72 years [4]. (The percentage of the subjects who were men was not reported for either of the last two studies).

The pre-training  $\text{VO}_2\text{max}$  of the men ( $22.2 \text{ ml.kg}^{-1}.\text{min}^{-1}$ ) was significantly higher than that of the women. Data from the English National Fitness Survey [21] for people aged 50–74 suggest that, on average, a woman's  $\text{VO}_2\text{max}$  (expressed as  $\text{ml.kg}^{-1}.\text{min}^{-1}$ ) will be about 78% of a man's. In this study the  $\text{VO}_2\text{max}$  of the women was 64% of the men's. Perhaps the men were already more highly trained than the women. There are few data on the  $\text{VO}_2\text{max}$  of octogenarian men. Harridge *et al.* report a  $\text{VO}_2\text{max}$  of  $27 \text{ ml.kg}^{-1}.\text{min}^{-1}$  in five men (mean age 85) who were still highly active in endurance walking or running [22], and de Wild *et al.* [23] report a  $\text{VO}_2\text{max}$

of  $27 \text{ ml.kg}^{-1}.\text{min}^{-1}$  in active men (mean age 77) participating in the Nijmegen 4-day march. It therefore seems unlikely that our men were already very highly trained.

One other possible explanation is that some of the men may have dropped some of their regular physical activities to accommodate the training classes. Although all subjects were asked to maintain current activities throughout the study, no written record of activity levels was made. However, verbal feedback throughout the training programme from subjects indicated that those who participated in regular activities (mainly golf and swimming), continued to do so throughout the training period.

Although the primary aim of the study was to determine the effects of training on  $\text{VO}_2\text{max}$ , a small strength training component was also included in the programme. It seems that including 10 minutes of strengthening exercise in an aerobic programme is not sufficient to improve strength in healthy, very elderly people.

We conclude that 24 weeks of predominantly aerobic training can increase the maximal aerobic power of very elderly women. The relative increases seen are similar to those reported for younger subjects. This finding could have major implications for older women; increasing  $\text{VO}_2\text{max}$  may well prevent them from crossing functionally important thresholds, thereby helping them to maintain their independence and avoid fatigue in everyday activities.

---

### Key points

- Even healthy women aged over 80 have very low values for maximal aerobic power, *viz* around  $14 \text{ ml.kg}^{-1}.\text{min}^{-1}$ .
  - 24 weeks of predominantly aerobic training can increase the maximal aerobic power of women aged over 80 by 15%.
  - This increase may improve their ability to sustain sub-maximal tasks, thereby helping to maintain independence.
- 

### Acknowledgements

The authors would like to thank all the experimental subjects for their commitment to the study. They also thank Dr Harold Verhaar for his help with the screening of the subjects and Forza Fitness International for the cycle ergometers. This work was funded by the Sir Halley Stewart Trust, Research into Ageing and Forza Fitness International.

### References

1. Hagberg JM. Effect of training on the decline of  $\text{VO}_2\text{max}$  with ageing. *Fed Proc* 1987; 46: 1830–3.

2. Dehn MM, Bruce RA. Longitudinal variations in maximal oxygen uptake with age and activity. *J Appl Physiol* 1972; 33: 805–7.
3. Tonino RP, Driscoll PA. Reliability of maximal and sub-maximal parameters of treadmill testing for the measurement of physical training in older persons. *J Gerontol* 1988; 43: M101–4.
4. Hagberg JM, Graves JE, Limacher M *et al.* Cardiovascular responses of 70–79 year old men and women to exercise training. *J Appl Physiol* 1989; 66: 2589–94.
5. Cress ME, Thomas DP, Johnson J *et al.* Effect of training on VO<sub>2</sub>max, thigh strength and muscle morphology in septuagenarian women. *Med Sci Sports Exerc* 1991; 23: 752–8.
6. Warren BJ, Nieman DC, Dotson RG *et al.* Cardiorespiratory responses to exercise training in septuagenarian women. *Int J Sports Med* 1993; 14: 60–5.
7. Greig CA, Young A, Skelton DA, Pippet E, Butler FMM, Mahmud SM. Exercise studies with elderly volunteers. *Age Ageing* 1994; 23: 185–9.
8. Skelton DA, Greig CA, Davies JM, Young A. Strength, power and related functional ability of healthy people aged 65–89 years. *Age Ageing* 1994; 23: 371–7.
9. Malbut KE, Dinan SM, Verhaar H, Young A. Maximal oxygen uptake in 80 year old men (Abstract). *Clin Sci* 1995; 89 (suppl. 33): 31P.
10. Sidney KH, Shephard RJ. Maximum and submaximum exercise tests in men and women in the 7th, 8th and 9th decades of life. *J Appl Physiol* 1977; 43: 280–7.
11. Borg G. Perceived exertion as an indication of somatic stress. *Scand J Rehab Med* 1970; 21: 82–98.
12. Koltyn KF, Morgan WP. Efficacy of perceptual versus heart rate monitoring in the development of endurance. *Br J Sports Med* 1992; 26: 132–4.
13. Hassmen P, Ceci R, Backman L. Exercise for older women: a training method and its influences on physical and cognitive performance. *Eur J Appl Physiol* 1992; 64: 460–6.
14. Ceci R, Hassmen P. Self-monitored exercise at three different RPE intensities in treadmill vs field running. *Med Sci Sports Exerc* 1991; 23: 732–8.
15. Sokal RR, Rohlf FJ. *Biometry: The Principles and Practice of Statistics in Biological Research*. San Francisco: W. H. Freeman and company, 1969; 198–201.
16. Gardner SB, Winter PD, Gardner MJ. *Confidence Interval Analysis (CIA) Microcomputer Program*. Version 1.0. London: British Medical Association, 1989.
17. Foster VL, Hume GJ, Dickinson AL, Chatfield SJ, Byrnes WC. The reproducibility of VO<sub>2</sub>max, ventilatory and lactate thresholds in elderly women. *Med Sci Sports Exerc* 1986; 18: 425–30.
18. Foster VL, Hume GJE, Byrnes WC, Dickinson AL, Chatfield SJ. Endurance training for elderly women—moderate vs low intensity. *J Gerontol* 1989; 44: M184–8.
19. Cunningham DA, Rechnitzer PA, Donner AP. Exercise training and the speed of self-selected walking pace in men at retirement. *Canadian J Aging* 1986; 5: 19–26.
20. Seals DR, Hagberg JM, Hurley BF, Ehsani AA, Holloszy JO. Endurance training in older men and women I. Cardiovascular responses to exercise. *J Appl Physiol* 1984; 57: 1024–9.
21. Skelton DA, Young A, Walker A, Hoinville E, The members of Activity and Health Research. *Physical Activity in Later Life; a Further Analysis of Physical Activity and Fitness Data for Adults aged 50 and Over*, Collected in the Allied Dunbar National Fitness Survey and the Health Education Authority National Survey of Activity and Health. London: Health Education Authority, 1999.
22. Harridge SDR, Magnusson G, Saltin B. Life-long endurance-trained elderly men have high aerobic power, but have similar muscle strength to non-active elderly men. *Aging: Clin Exp Res* 1997; 9: 80–7.
23. de Wild GM, Hoefnagels WH, Oeseburg B, Binkhorst RA. Maximal oxygen uptake in 153 elderly Dutch people (69–87 years) who participated in the 1993 Nijmegen 4-day march. *Eur J Appl Physiol Occ Physiol* 1995; 72: 134–43.

Received 14 June 2001; accepted in revised form 10 January 2002
